# Supplementary material for: Non‐apoptotic caspase activation preserves Drosophila intestinal progenitor cells in quiescence
Source: PubMed Central journal article supplement (PMC7726796; doi:10.15252/embr.201948892), 2020-11-01
Supplement: EMBR-21-e48892-s002.pdf [file EMBR-21-e48892-s002.pdf]

## Expanded View Figures

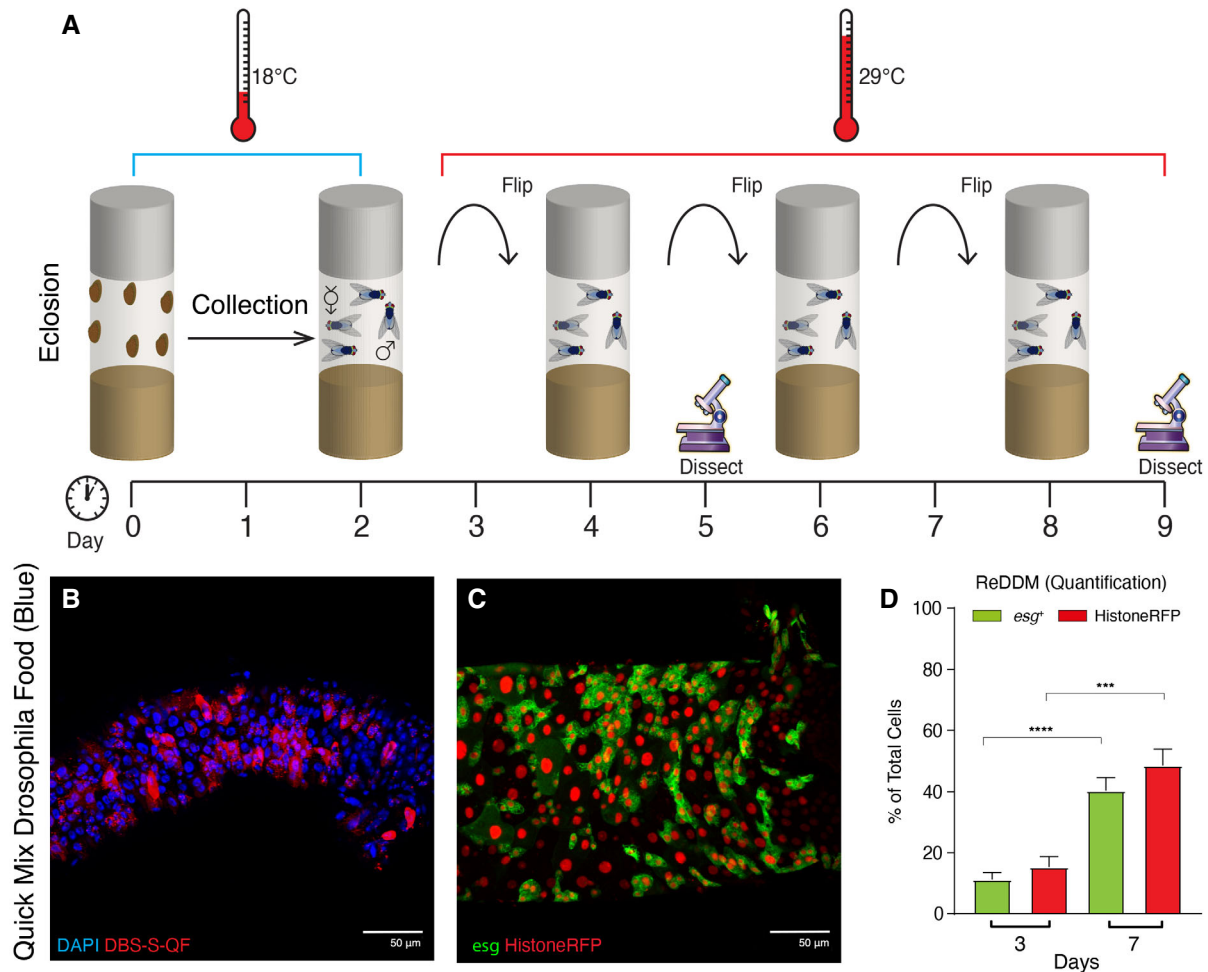

**Figure EV1. Schematic of *Drosophila* experimental regime and results obtained using *Drosophila* Quick Mix Blue food.**

- A Parental *Drosophila* strains were crossed at 18°C and the progeny collected for 2 days post-eclosion. After 2 days together, adult male and female flies were shifted at 29°C, where they were maintained and transferred to new vials with fresh food every two days. Experimental flies were dissected at 3 and/or 7 days post-temperature shift at 29°C.
- B Representative example of DBS-S-QF activation in (red, immunostaining anti-HA) from flies reared in *Drosophila* Quick Mix Media (Blue) following the experimental regime described in (A); note the widespread activation of the DBS-S-QF reporter 7 days post-temperature shift at 29°C. DAPI (blue) labels the nuclei. Genotype:  $w^{1118}$  DBS-S-QF, UAS-*mCD8-GFP*, QUAS-*tomato-HA*.
- C Representative example of the ReDDM labelling in a *Drosophila* intestine reared in *Drosophila* Quick Mix Media (Blue) following the experimental regime described in A; *esg* expression (green, GFP) labels intestinal progenitor cells (ISCs and EBs) and Histone-RFP (red) acts as a semi-permanent marker of differentiated intestinal cells as either EEs or ECs, after the *esg* promoter is silenced. Note the high number of Histone-RFP-positive cells without GFP signal as an indication of epithelial replenishment. Genotype:  $w^{1118}$ , *esg-Gal4* UAS-CD8-GFP/Cyo; *TubG80<sup>TS</sup>* UAS-Histone-RFP
- D Quantification of the ReDDM experiment shown in (C); note the significant increase of *esg* (\*\*\*\* $P < 0.0001$ ) and Histone-RFP (\*\*\* $P = 0.0004$ ) labelled cells (Quantifications were made using  $N \geq 2$  biological replicates; unpaired two-tailed *t*-test, 3d  $n = 14$ , 7d  $n = 34$ ). Error bars represent standard error of the mean.  $w^{1118}$ ; *esg-Gal4* UAS-CD8-GFP/Cyo; *TubG80<sup>TS</sup>* UAS-Histone-RFP.

**Figure EV2. Genome engineering of the *Dronc* locus and *Dronc* alleles.**

- A Schematic diagrams showing the wild-type configuration of the *Dronc* locus before (upper lane) and after (bottom lane) targeting with CRISPR/Cas9; note the replacement of the first exon of the gene (orange box) with an attP-integration site (red box).
- B Agarose gel showing the PCR amplification of the genomic region around exon 1 of *Dronc* from larvae of the following genotypes (first lane, Wild-type +/+), heterozygous mutant flies (second lane, *Dronc*<sup>KO</sup> +/-) and homozygous mutant flies (third lane, *Dronc*<sup>KO</sup> -/-). Genotypes: (*w*<sup>1118</sup>); (*w*<sup>1118</sup>; *Dronc*<sup>KO</sup>/+); (*w*<sup>1118</sup>; *Dronc*<sup>KO</sup>/*Dronc*<sup>KO</sup>).
- C The new *Dronc*<sup>KO</sup>-mutant allele is homozygous lethal in pupal stages in homozygous conditions, but also in trans-heterozygous combinations with other amorphic alleles (*Dronc*<sup>129</sup>) as shown in the figure. Genotype: *w*<sup>1118</sup>; *Dronc*<sup>KO</sup>/*Dronc*<sup>129</sup>.
- D Heterozygous *Dronc*<sup>KO</sup> mutant fly (*Dronc*<sup>KO</sup>/+). Genotype: *w*<sup>1118</sup>; *Dronc*<sup>KO</sup>/+.
- E The insertion of a wild-type cDNA of *Dronc* into the *Dronc*<sup>KO</sup> allele can rescue at large extent the *Dronc* insufficiency (*Dronc*<sup>KO-Dronc-WT</sup>/*Dronc*<sup>KO</sup>); notice that only the adult wings were less transparent (arrow) than in the heterozygous controls (d) and sometimes are improperly extended. Genotype: *w*<sup>1118</sup>; *Dronc*<sup>KO</sup>/*Dronc*<sup>KO-FL-DroncWT-Suntag-HA</sup>.
- F-L Plasmid configuration of the different constructs inserted into the *Dronc*<sup>KO</sup> attP site.
- M Western blot showing the expression of FLWT (*Dronc*<sup>KO-FLWT-suntag-HA-Cherry</sup>/+), FLCAEA (*Dronc*<sup>KO-FLCAEA-suntag-HA-Cherry</sup>/+) and dCAEA (*Dronc*<sup>KO-dCAEA-suntag-HA-Cherry</sup>/+) constructs inserted into the endogenous *Dronc* locus, note that each of the constructs appear to be expressed at the same levels. Genotypes: (*w*<sup>1118</sup>; *Dronc*<sup>KO-FLWT-suntag-HA-Cherry</sup>/+), (*w*<sup>1118</sup>; *Dronc*<sup>KO-FLCAEA-suntag-HA-Cherry</sup>/+); (*w*<sup>1118</sup>; *Dronc*<sup>KO-dCAEA-suntag-HA-Cherry</sup>/+).
- N Plasmid configuration of a Gal4 constructs inserted into the *Dronc*<sup>KO</sup> attP site.

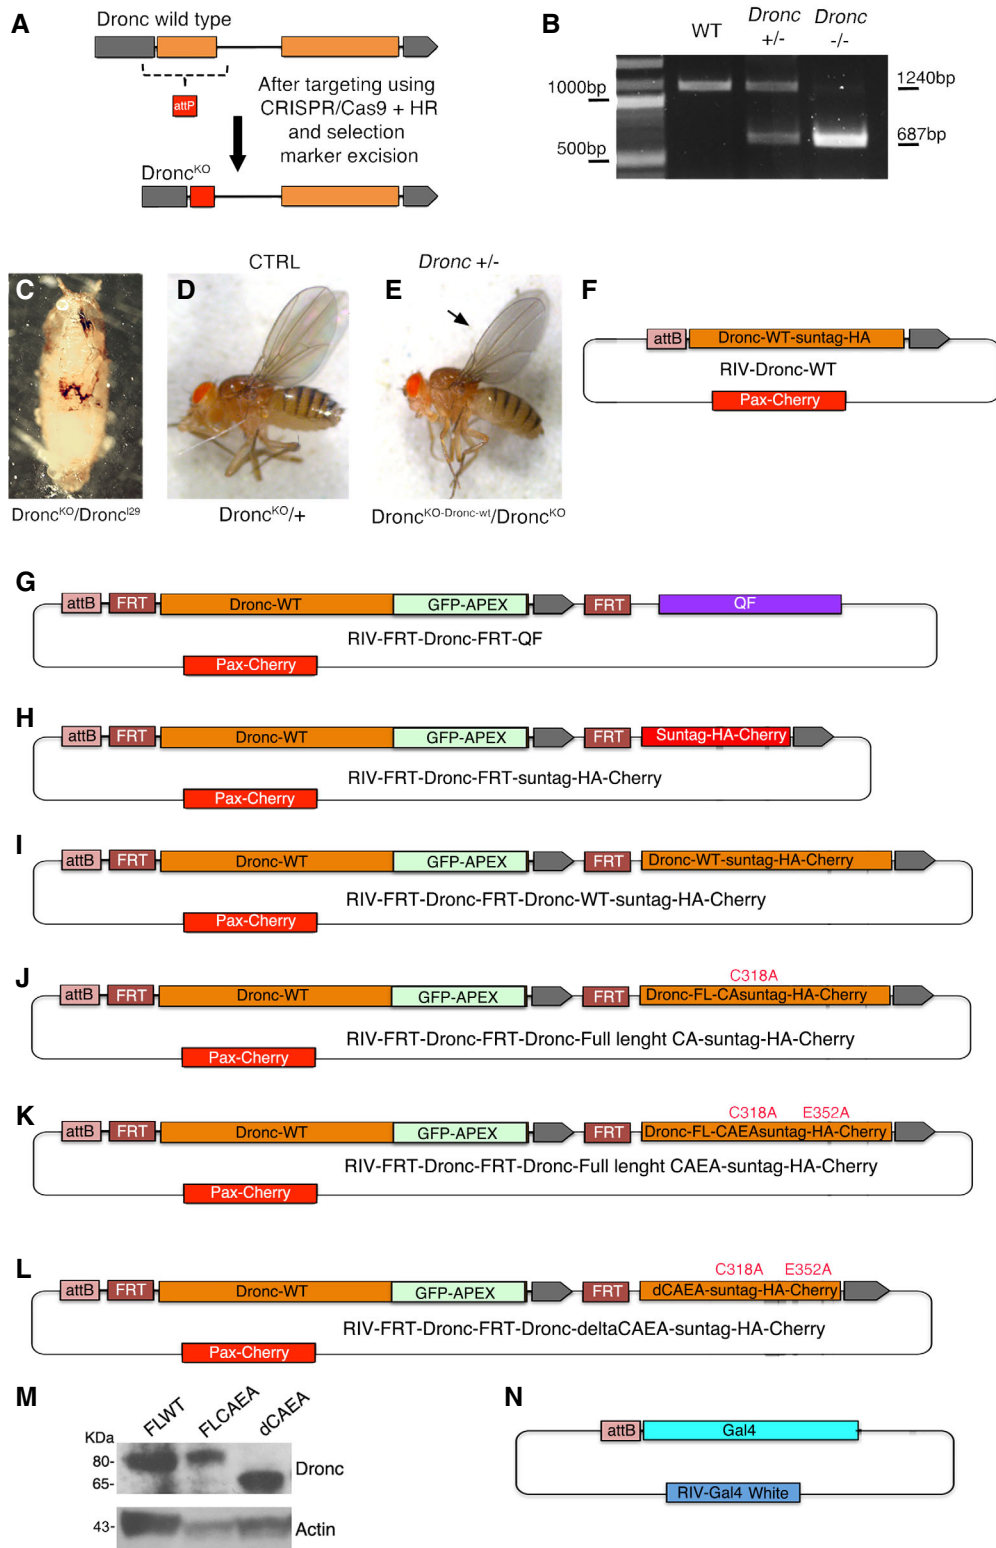

Figure EV2.

**Figure EV3. *Dronc* functions are related to its enzymatic activity.**

- A Representative image of a *Dronc* WT intestine, reared in Oxford Medium under an experimental regime which protects epithelial integrity, showing ReDDM activation for 7 days post-temperature shift at 29°C. The Flippase-mediated excision of the FRT-flanked wild-type cDNA of *Dronc* allows the expression of a wild-type construct of *Dronc* tagged with Suntag, HA and cherry that does not cause epithelial alterations. DAPI (blue) labels the nuclei in all the figure. Genotype:  $w^{1118}; esg-Gal4$  UAS-*CD8-GFP/+*; *TubG80<sup>ES</sup>* UAS-*Histone-RFP Dronc<sup>KO</sup>*/UAS-*Flippase FRT Dronc-GFP-APEX FRT Dronc-FLWT-suntag-HA-Cherry*.
- B Representative image of a *Dronc* heterozygous intestine (see full genotype description in Materials and Methods), reared in Oxford Medium under an experimental regime which protects epithelial integrity, showing ReDDM activation for 7 days post-temperature shift at 29°C; *esg* expression (green) labels the intestinal progenitor cells, *Histone-RFP* (red) is a semi-permanent marker retained in differentiated cells. Genotype:  $w^{1118}; esg-Gal4$  UAS-*CD8-GFP/+*; *TubG80<sup>ES</sup>* UAS-*Histone-RFP Dronc<sup>KO</sup>*/+.
- C Representative image of ReDDM labelling showing a *Dronc*-mutant intestine, expressing a catalytically inactive form of *Dronc* (FLCA) in progenitor cells (*esg*-positive cells, green) in a *Dronc* KO genetic background for 7 days post-temperature shift at 29°C; notice that *esg*-labelled cells appear enlarged and guts appear hyperplastic compared with (A). Genotype:  $w^{1118}; esg-Gal4$  UAS-*CD8-GFP/+*; *TubG80<sup>ES</sup>* UAS-*Histone-RFP Dronc<sup>KO</sup>*/UAS-*Flippase FRT Dronc-FLCA-suntag-HA-Cherry*.
- D Representative image of ReDDM labelling showing a *Dronc* mutant intestine expressing in progenitor cells (*esg*-positive cells, green) a catalytically inactive and non-cleavable form of *Dronc* (FLCAEA) in a heterozygous KO *Dronc* mutant genetic background for 7 days post-temperature shift at 29°C; notice that *esg*-labelled cells appear enlarged and guts appear hyperplastic compared with (A). Genotype:  $w^{1118}; esg-Gal4$  UAS-*CD8-GFP/+*; *TubG80<sup>ES</sup>* UAS-*Histone-RFP Dronc<sup>KO</sup>*/UAS-*Flippase FRT Dronc-FLCAEA-suntag-HA-Cherry*.
- E Equivalent to the experiment described in (B) and (C) but in this case *esg*-progenitor cells are forced to express a catalytically inactive form of *Dronc* without the CARD domain (delta-CAEA, dCAEA). Genotype:  $w^{1118}; esg-Gal4$  UAS-*CD8-GFP/+*; *TubG80<sup>ES</sup>* UAS-*Histone-RFP Dronc<sup>KO</sup>*/UAS-*Flippase FRT Dronc-GFP-APEX FRT Dronc-delta-CAEA-suntag-HA-Cherry*.
- F Quantification of the percentage of *esg*-expressing cells relative to DAPI; note the increase of *esg*-expressing cells in the different mutant conditions in comparison with a *Dronc* heterozygous mutant background (FLCA, \*\*\*\* $P < 0.0001$ ; FLCAEA \* $P = 0.0212$ ;  $\Delta$ CAEA, \*\*\*\* $P < 0.0001$ ) (Quantifications were made using  $N \geq 2$  biological replicates; Dunnett's multiple comparisons test, +/-  $n = 61$ , -/FLCA  $n = 21$  -/FLCAEA  $n = 26$ , -/ $\Delta$ CAEA  $n = 37$ ). Error bars represent standard deviation of the mean. Quantifications in graph refer to genotypes from (A–E).
- G Quantification of average cell size of *esg*-expressing cells ( $\mu\text{m}^2$ ; FLCA, \*\*\* $P = 0.0002$ ; FLCAEA, \*\*\* $P = 0.0007$ ;  $\Delta$ CAEA, \*\* $P = 0.0058$ ) (Quantifications were made using  $N \geq 2$  biological replicates; Dunnett's multiple comparisons test, +/-  $n = 61$ , -/FLCA  $n = 23$ , -/FLCAEA  $n = 26$ , -/ $\Delta$ CAEA  $n = 37$ ). Error bars represent standard deviation of the mean. Quantifications in graph refer to genotypes from (A–E).
- H Quantification of the percentage of *Histone-RFP* cells without GFP signal relative to DAPI; notice that the number of cells only expressing *Histone-RFP* is significantly higher in the FLCA (\*\*\*\* $P < 0.0001$ ), FLCAEA (\*\*\*\* $P < 0.0001$ ) and  $\Delta$ CAEA (\*\*\* $P = 0.0001$ ) genetic backgrounds (Quantifications were made using  $N \geq 2$  biological replicates; Dunnett's multiple comparisons test, +/-  $N = 39$ , -/FLCA  $n = 16$ , -/FLCAEA  $n = 19$ , -/ $\Delta$ CAEA  $n = 14$ ). Error bars represent standard deviation of the mean. Quantifications in graph refer to genotypes from (A–E).

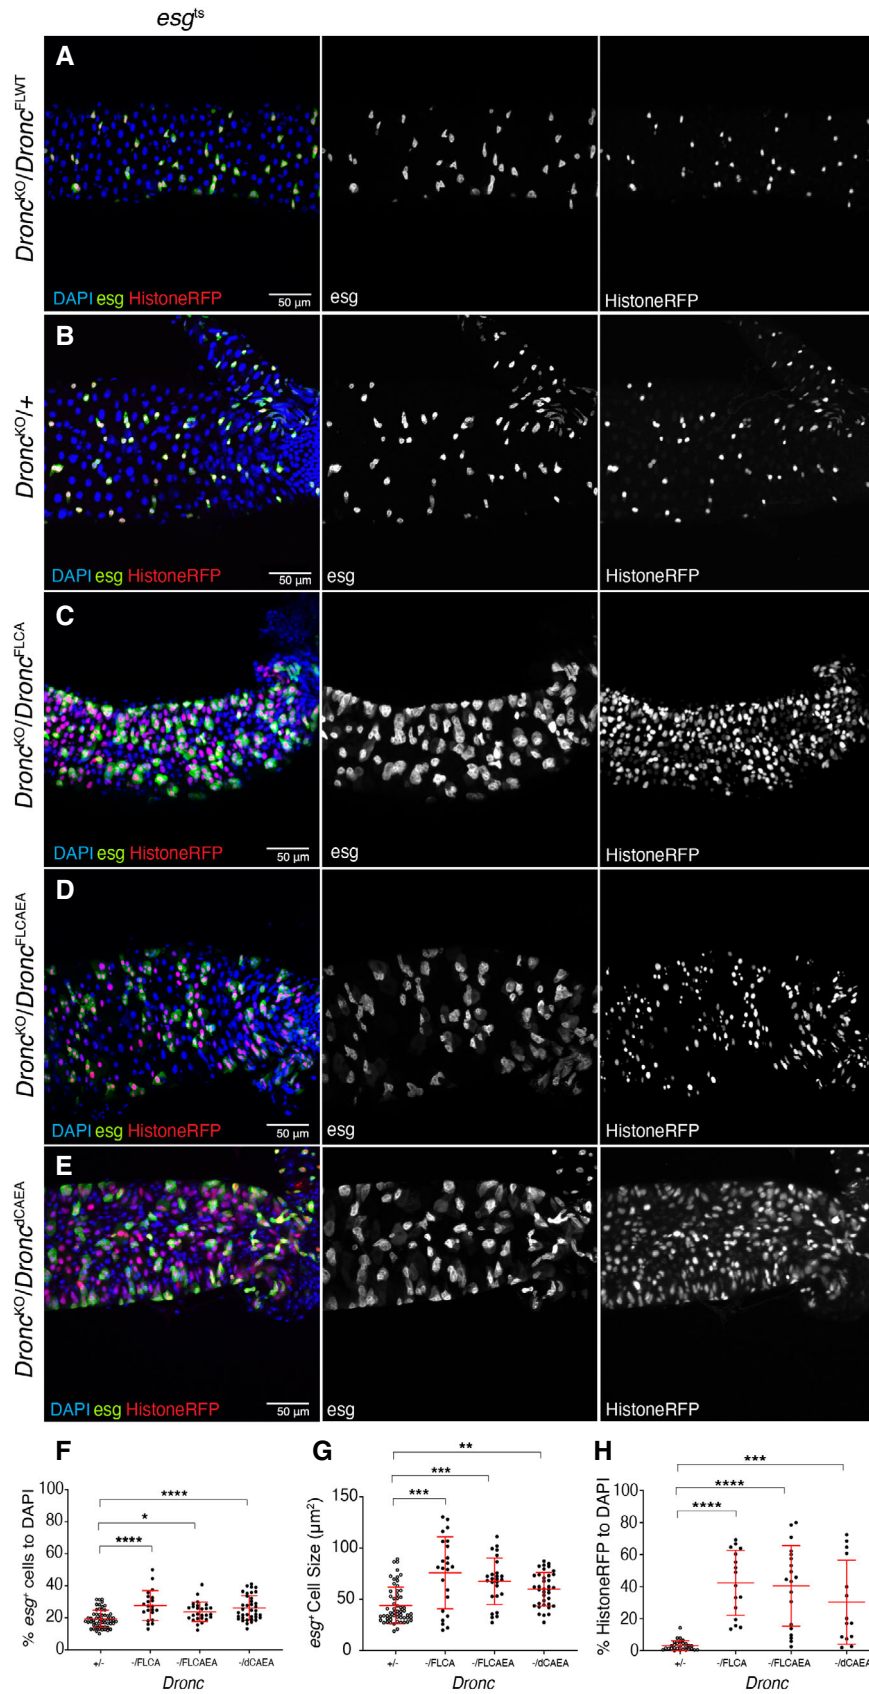

Figure EV3.

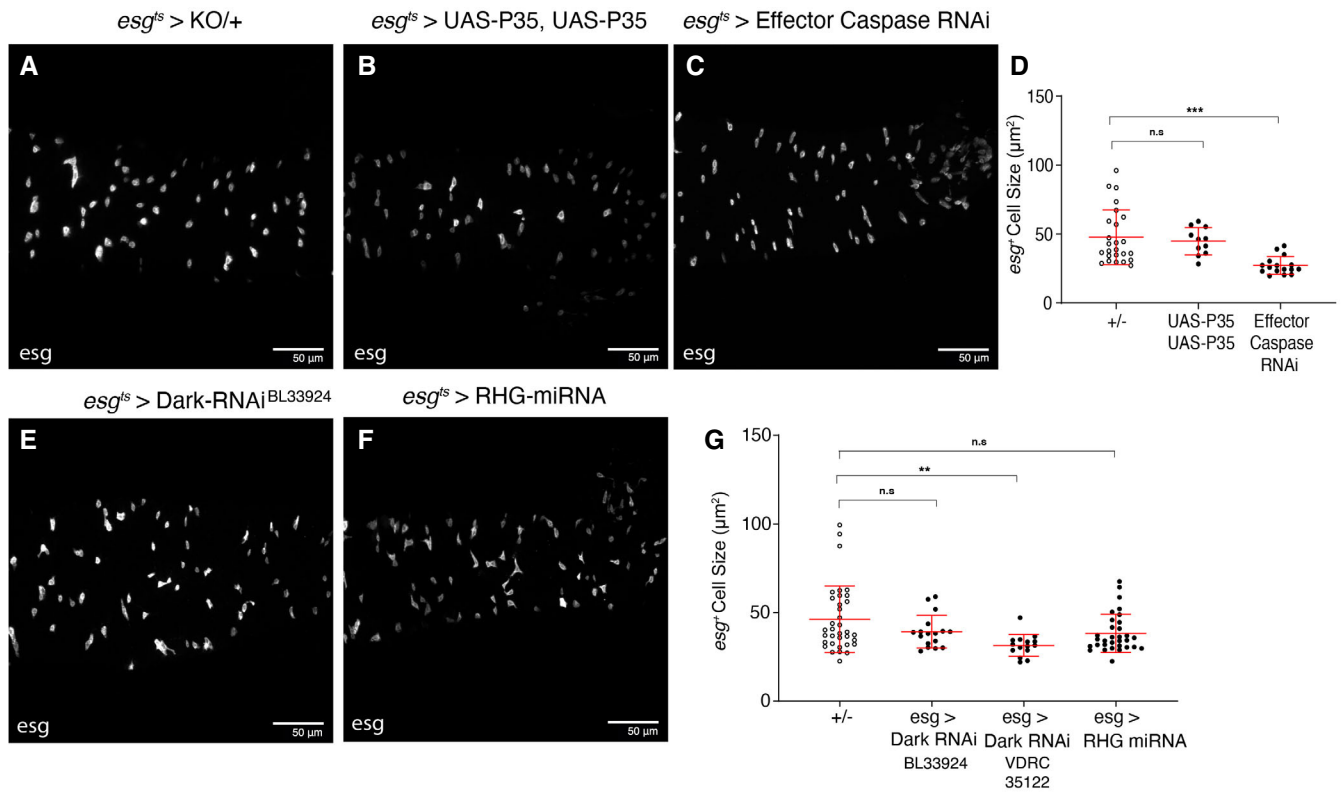

**Figure EV4. *Dronc* regulates EB cellular properties independently of the effector caspases and upstream pro-apoptotic factors.**

- A** 7d post-temperature shift to 29°C. *Dronc* heterozygous intestine. All of the experiments described in the figure were performed in Oxford medium following an experimental regime which protects epithelial integrity. *esg*-Gal4 UAS-GFP labels ISCs and EBs in the panel A–C, E and F. Genotypes:  $w^{1118}$ ; *esg*-Gal4 UAS-*CD8-GFP/+*; *TubG80<sup>ts</sup>* UAS-*Histone-RFP Dronc<sup>KO/+</sup>*.
- B** The overexpression of two copies of the effector caspase activity inhibitor (P35) under the regulation of *esg*-Gal4 does not cause morphological defects or an increase in cell size of intestinal progenitor cells ( $P = 0.8307$ ). Genotypes:  $w^{1118}$ ; *esg*-Gal4 UAS-*CD8-GFP/UAS-P35*; *TubG80<sup>ts</sup>* UAS-*Histone-RFP Dronc<sup>KO</sup>/UAS-P35*.
- C** Concomitant overexpression of RNAi against all known *Drosophila* effector caspases under the regulation of *esg*-Gal4. The knockdown of all effector caspases fails to recapitulate the increase in cell size observed following loss of *Dronc* ( $P = 0.0002$ ). Genotype:  $w^{1118}$ ; *esg*-Gal4 UAS-*CD8-GFP/UAS-Drice RNAi UAS-Decay RNAi* (Pascal Meier); *TubG80<sup>ts</sup>* UAS-*Histone-RFP Dronc<sup>KO</sup>/UAS-Damm RNAi UAS-DCP1 RNAi* (Pascal Meier).
- D** Quantification of average *esg* cell size ( $\mu\text{m}^2$ ) (n.s.  $P > 0.5$ ; \*\*\* $P = 0.001$ ) (Quantifications were made using  $N \geq 2$  biological replicates; Dunn's multiple comparisons test, +/-  $n = 25$ , 2 × P35  $n = 11$ , Effector Caspase RNAi  $N = 16$ ). Error bars represent standard deviation of the mean. Quantifications in graph refer to genotypes from (A–C).
- E** The overexpression of RNAi against Dark. There is not significant change in cell size compared with +/- ( $P = 0.2222$ ). Genotype:  $w^{1118}$ ; *esg*-Gal4 UAS-*CD8-GFP/+*; *TubG80<sup>ts</sup>* UAS-*Histone-RFP Dronc<sup>KO</sup>/UAS-Dark RNAi* (BL33924).
- F** Overexpression of a miRNA against the pro-apoptotic factors, hid, reaper and grim. Note, the inhibition of these factors does not result in any noticeable phenotypes (ns;  $P = 0.0521$ ). Genotype:  $w^{1118}$ ; *esg*-Gal4 UAS-*CD8-GFP/+*; *TubG80<sup>ts</sup>* UAS-*Histone-RFP Dronc<sup>KO</sup>/UAS-miRNA-RHG* (I. Hariharan).
- G** Quantification of average *esg* cell size ( $\mu\text{m}^2$ ). There is no increase in cell size following overexpression of two different Dark RNAis (n.s.  $P = 0.2222$  and \*\* $P = 0.0020$ ) or a miRNA against the pro-apoptotic factors (n.s.  $P = 0.0521$ ) (Quantifications were made using  $N \geq 2$  biological replicates; Dunn's multiple comparisons test, +/-  $n = 36$ , *esg* > Dark RNAi (1)  $n = 17$ , *esg* > Dark RNAi (2)  $n = 16$ , *esg* > RHG miRNA  $n = 35$ ). Error bars represent standard deviation of the mean. Quantifications in graph refer to genotypes from Fig 4E and F and an extra Dark RNAi (VDR35122).
